# Supplementary material for: Selective Supercritical CO2 Extraction and Biocatalytic Valorization of Cucurbita pepo L. Industrial Residuals
Source: MDPI journal article supplement (doi:10.3390/molecules27154783), 2022-07-26
Supplement: s1 [file s1]

## Supporting Information

GC/MS analyses of the biocatalytic esterification and amidation of palmitic acid (used for optimization) and of the ethanol amides of oleic and linoleic acids prepared as standards

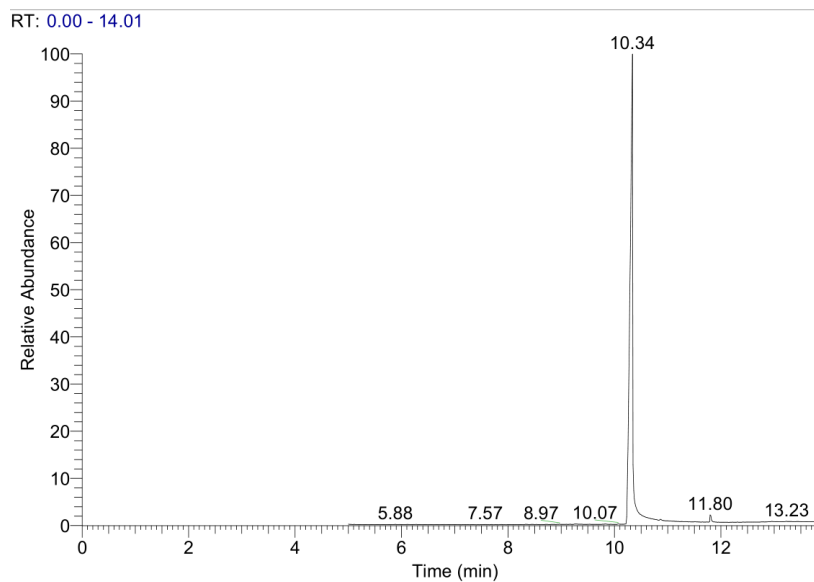

**Figure S1. Palmitic acid**

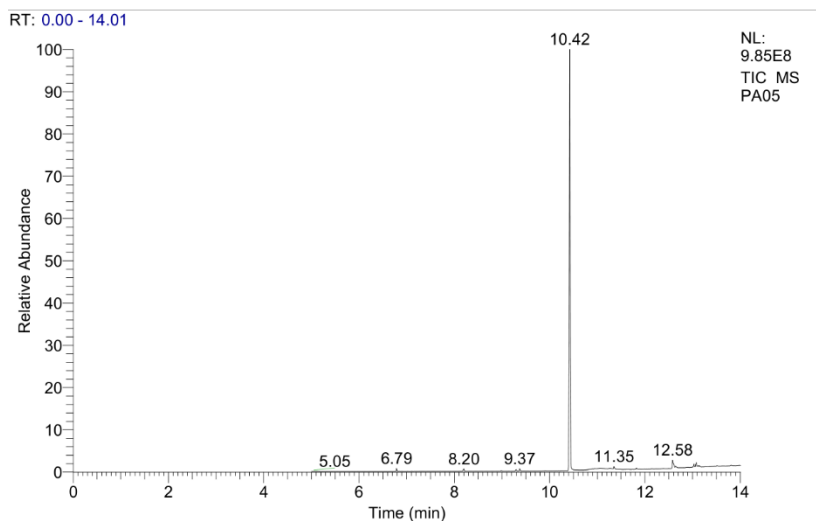

**Figure S2. Palmitic acid methyl ester**

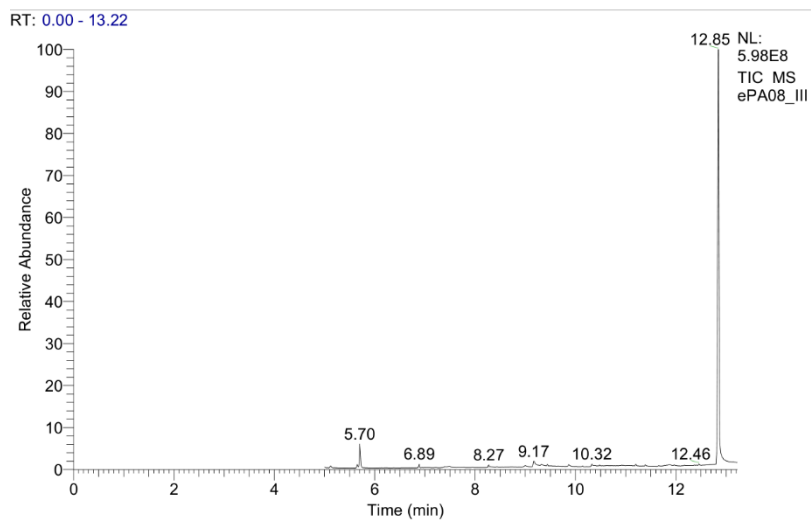

**Figure S3. Palmitoyl ethanolamide**

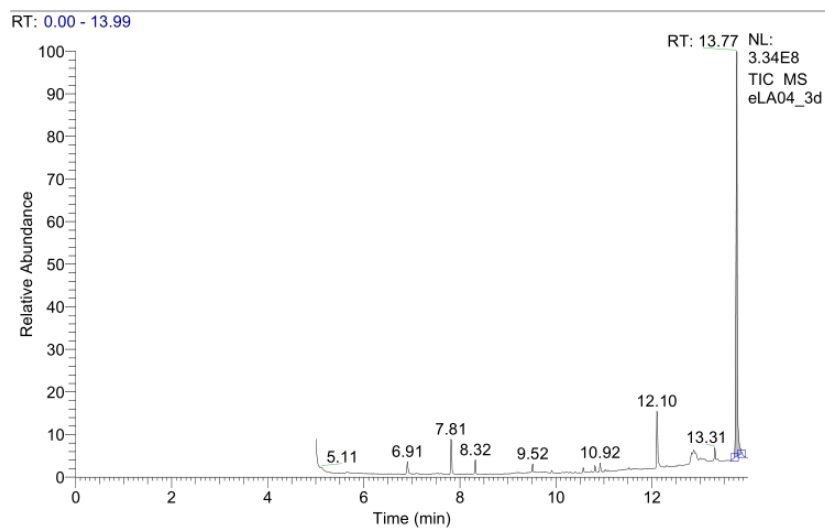

**Figure S4. Linoleyl ethanolamide**

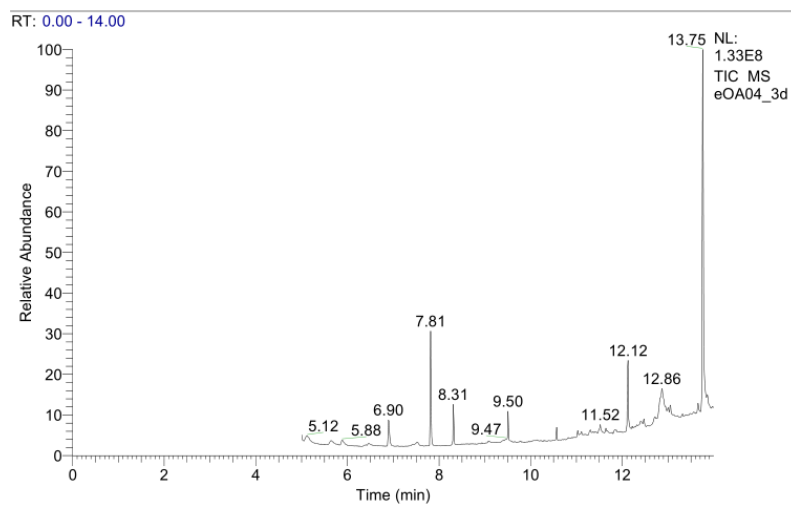

**Figure S5. Oleyl ethanolamide**
